# Supplementary material for: Tailoring of a TiO2 nanotube array-integrated portable microdevice for efficient on-chip enrichment and isotope labeling of serum phosphopeptides
Source: Royal Society of Chemistry journal article supplement (doi:10.1039/c3lc50548k), 2013-01-01
Supplement: c3lc50548k.pdf [file c3lc50548k.pdf]

# Tailoring of TiO<sub>2</sub> Nanotube Array-Integrated Portable Microdevice for Efficient on-Chip Enrichment and Isotope Labeling of Serum Phosphopeptides

Qianhao Min, Xueqin Chen, Xiaoxia Zhang and Jun-Jie Zhu\*

## Supplementary Information

**Table S1** The phosphopeptides identified from tryptic digests of  $\beta$ -casein after on-chip enrichment by using TNA-integrated microdevice with linear channel followed by MALDI-TOF MS analysis.

| No.       | Peptide sequence                      | Number of phosphoryl groups | Observed mass |
|-----------|---------------------------------------|-----------------------------|---------------|
| $\beta$ 1 | FQ[pS]EEQQQTEDELQDK                   | 1                           | 2062.202      |
| $\beta$ 2 | IEKFQ[pS]EEQQQTEDELQDK                | 1                           | 2432.693      |
| $\beta$ 3 | FQ[pS]EEQQQTEDELQDKIHPF               | 1                           | 2556.708      |
| $\beta$ 4 | RELEELNVPGEIVE[pS]L[pS][pS][pS]EESITR | 4                           | 3122.911      |

[pS]: phosphorylated site.

**Table S2** The phosphopeptides identified from tryptic digests of  $\alpha$ -casein after on-chip enrichment by using S-shaped microdevice followed by MALDI-TOF MS analysis.

| No.         | Peptide sequence                     | Number of phosphoryl groups | Observed mass |
|-------------|--------------------------------------|-----------------------------|---------------|
| $\alpha$ 1  | TVDME[pS]TEVFTK                      | 1                           | 1466.754      |
| $\alpha$ 2  | TVD[Mo]E[pS]TEVFTK                   | 1                           | 1482.601      |
| $\alpha$ 3  | KTVDME[pS]TEVFTK                     | 1                           | 1594.579      |
| $\alpha$ 4  | KTVD[Mo]E[pS]TEVFTK                  | 1                           | 1610.554      |
| $\alpha$ 5  | VPQLEIVPN[pS]AEER                    | 1                           | 1660.666      |
| $\alpha$ 6  | YLGEYLIVPN [pS]AEER                  | 1                           | 1833.003      |
| $\alpha$ 7  | DIG[pS]E[pS]TEDQAMEDIK               | 2                           | 1927.456      |
| $\alpha$ 8  | DIG[pS]E[pS]TEDQA[Mo]EDIK            | 2                           | 1943.376      |
| $\alpha$ 9  | YKVPQLEIVPN[pS]AEER                  | 1                           | 1951.892      |
| $\alpha$ 10 | KKYKVPQLEIVPN[pS]AEERL               | 1                           | 2080.933      |
| $\alpha$ 11 | NTMEHV[pS][pS][pS]EESII[pS]QETYSK    | 4                           | 2619.099      |
| $\alpha$ 12 | NT[Mo]EHV[pS][pS][pS]EESII[pS]QETYSK | 4                           | 2635.232      |

|             |                                         |   |          |
|-------------|-----------------------------------------|---|----------|
| $\alpha$ 13 | VNEL[pS]KDIG[pS]E[pS]TEDQAMEDIK         | 3 | 2678.808 |
| $\alpha$ 14 | Q*MEAE[pS]I[pS][pS] [pS]EEIVPN[pS]VEAQK | 5 | 2703.554 |
| $\alpha$ 15 | QMEAE[pS]I[pS][pS][pS]EEIVPNPN[pS]VEQK  | 5 | 2720.479 |
| $\alpha$ 16 | KEKVNEL[pS]KDIG[pS]E[pS]TEDQAMEDIKQ     | 3 | 2936.012 |
| $\alpha$ 17 | KEKVNEL[pS]KDIG[pS]E[pS]TEDQA[Mo]EDIKQ  | 3 | 2952.091 |
| $\alpha$ 18 | NANEEYYSIG[pS][pS][pS]EE[pS]AEVATEEVK   | 4 | 3008.452 |
| $\alpha$ 19 | NANEEY[pS]IG[pS][pS][pS]EE[pS]AEVATEEVK | 5 | 3088.108 |

[pS]: phosphorylated site;

[Mo]: oxidation on methionine;

\*Pyroglutamylation on the N-terminal Q.

**Table S3** The phosphopeptides identified from human serum after on-chip enrichment and isotope dimethyl labeling by using TNA-integrated microdevice followed by MALDI-TOF MS analysis.

| No. | Peptide sequence    | Number of phosphoryl groups | Original mass (m/z) | Labeled by CH <sub>2</sub> O (m/z) | Labeled by CD <sub>2</sub> O(m/z) |
|-----|---------------------|-----------------------------|---------------------|------------------------------------|-----------------------------------|
| HS1 | D[pS]GEGDFLAEGGGV   | 1                           | 1389.520            | 1417.680                           | 1421.704                          |
| HS2 | AD[pS]GEGDFLAEGGGV  | 1                           | 1460.557            | 1488.718                           | 1492.756                          |
| HS3 | D[pS]GEGDFLAEGGGVR  | 1                           | 1545.635            | 1573.801                           | 1577.811                          |
| HS4 | AD[pS]GEGDFLAEGGGVR | 1                           | 1616.670            | 1644.834                           | 1648.868                          |

[pS]: phosphorylated site.

**Table S4** The intensity ratios of the four serum phosphopeptides enriched from normal sera to control sera.

| Intensity ratio (H/D) | HS1   | HS2   | HS3   | HS4   |
|-----------------------|-------|-------|-------|-------|
| Sample1               | 1.166 | 0.551 | 1.265 | 0.614 |
| Sample2               | 1.105 | 0.634 | 1.072 | 0.595 |
| Sample3               | 0.690 | 0.670 | 1.076 | 0.776 |
| Sample4               | 0.639 | 0.799 | 1.044 | 1.067 |
| Sample5               | 0.952 | 0.727 | 0.985 | 0.967 |
| Sample6               | 1.134 | 1.157 | 1.018 | 0.931 |
| Sample7               | 1.045 | 0.939 | 0.993 | 1.467 |
| Average               | 0.961 | 0.783 | 1.065 | 0.917 |
| Standard Deviation    | 0.215 | 0.207 | 0.095 | 0.301 |

**Table S5** The intensity ratios of the four serum phosphopeptides enriched from patient sera to control sera.

| <b>Intensity ratio<br/>(H/D)</b> | <b>HS1</b> | <b>HS2</b> | <b>HS3</b> | <b>HS4</b> |
|----------------------------------|------------|------------|------------|------------|
| Sample1                          | 1.648      | 0.864      | 0.891      | 0.184      |
| Sample2                          | 2.105      | 0.715      | 0.858      | 0.215      |
| Sample3                          | 1.862      | 0.697      | 0.993      | 0.316      |
| Sample4                          | 3.134      | 0.609      | 1.148      | 0.171      |
| Sample5                          | 2.629      | 0.835      | 0.877      | 0.181      |
| Sample6                          | 2.658      | 1.172      | 1.060      | 0.289      |
| Sample7                          | 2.222      | 0.815      | 0.856      | 0.243      |
| Average                          | 2.322      | 0.815      | 0.955      | 0.229      |
| Standard Deviation               | 0.515      | 0.181      | 0.115      | 0.057      |

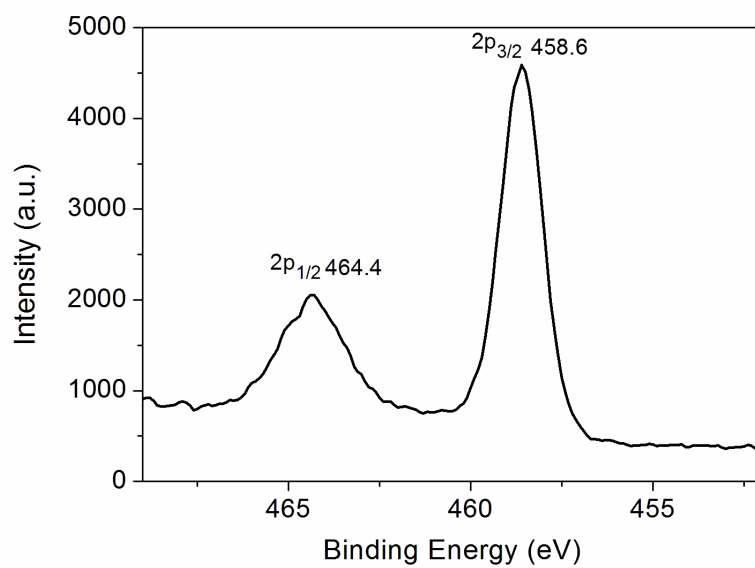

**Fig. S1** XPS spectrum of Ti 2p in the TNAs.

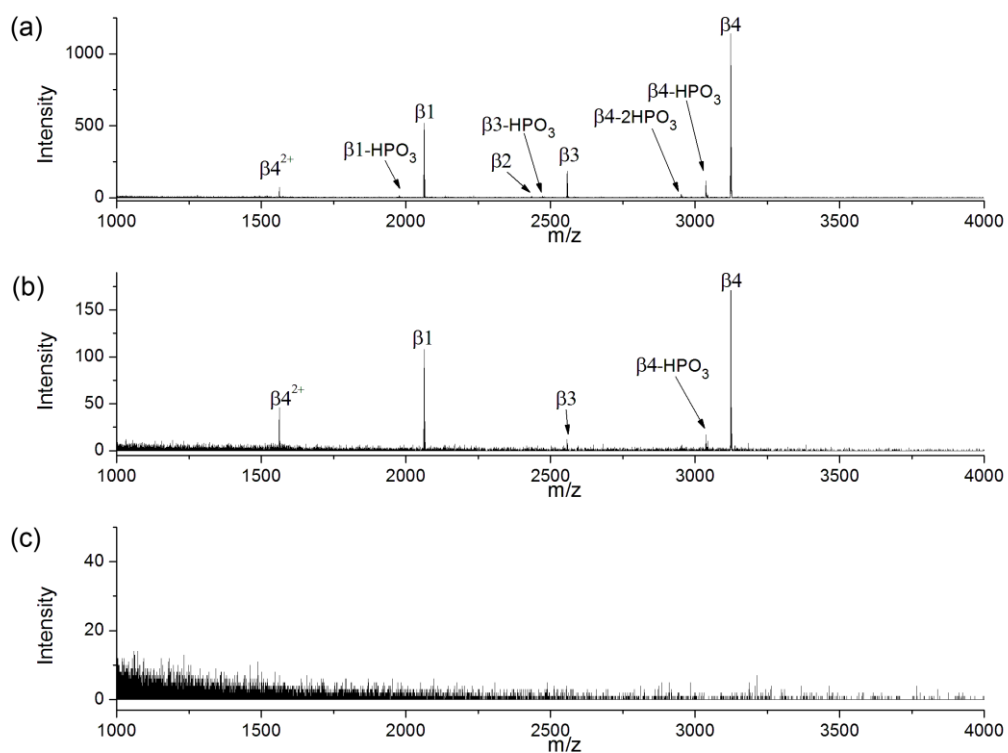

**Fig. S2** MALDI-TOF MS spectra of (a) the first fraction (0~5  $\mu$ L), (b) the second fraction (5~10  $\mu$ L) and (c) the third fraction (10~15  $\mu$ L) eluted from TNA-integrated microdevice after enrichment of phosphopeptides from tryptic digests of  $\beta$ -casein.

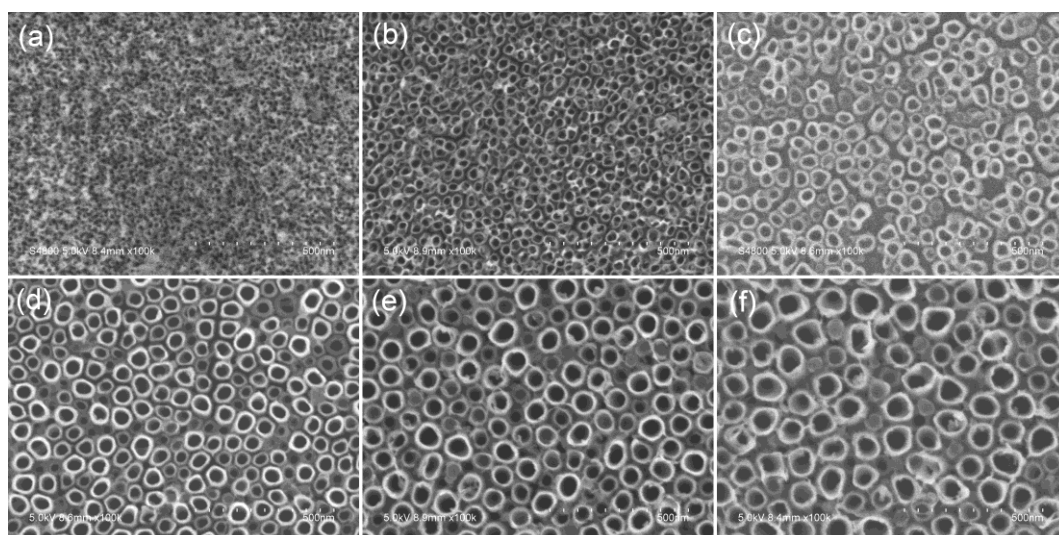

**Fig. S3** SEM images of TNAs anodized at the voltage of (a) 5 V, (b) 10 V, (c) 15 V, (d) 20 V, (e) 25 V and (f) 30 V.

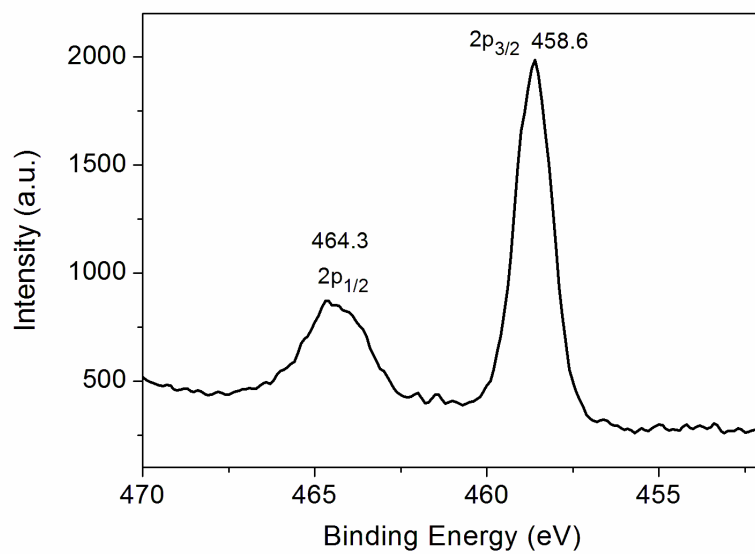

**Fig. S4** XPS spectrum of Ti 2p in the calcined Ti film without anodization.

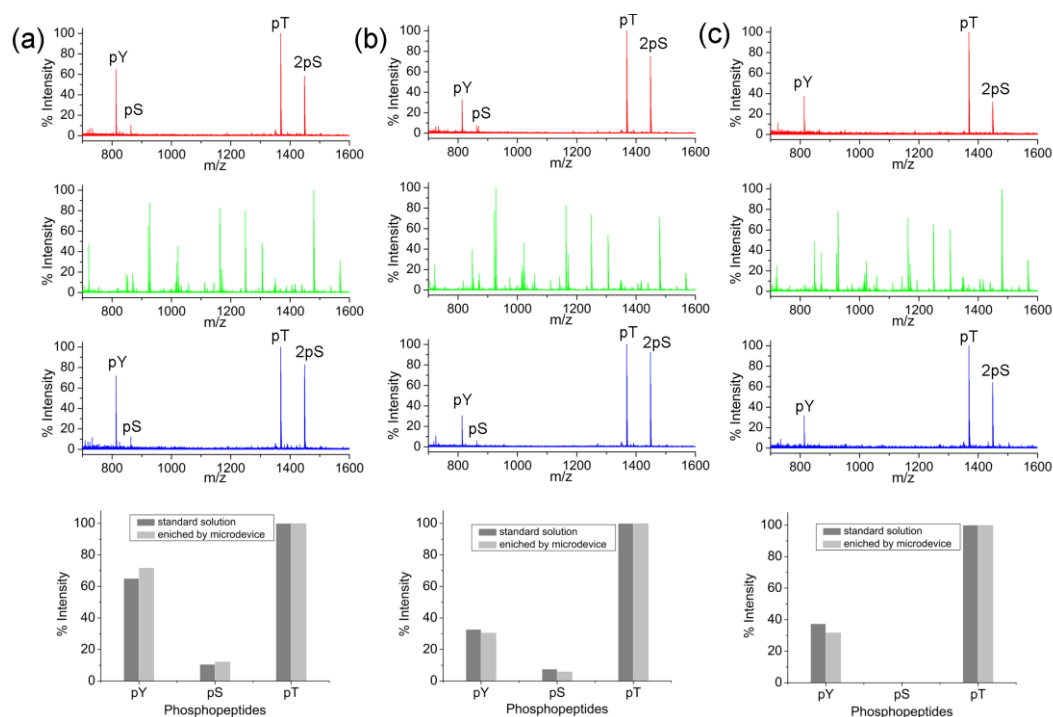

**Fig. S5** Enrichment selectivity of phosphopeptides with different phosphorylation sites. 10  $\mu\text{l}$  (a) 0.8 pmol/ $\mu\text{l}$ , (b) 0.2 pmol/ $\mu\text{l}$  and (c) 0.08 pmol/ $\mu\text{l}$  standard phosphopeptide mixtures containing equivalent pY, pS, pT and 2pS were used for the investigation. Red spectra: MS spectra of standard phosphopeptide mixture; green spectra: MS spectra of digests of BSA spiked with standard phosphopeptide mixture; blue spectra: phosphopeptides enriched by microdevice and eluted by the first 10  $\mu\text{l}$   $\text{NH}_3\cdot\text{H}_2\text{O}$ . The bar charts show the comparison of relative intensities of three phosphopeptides before and after enrichment.



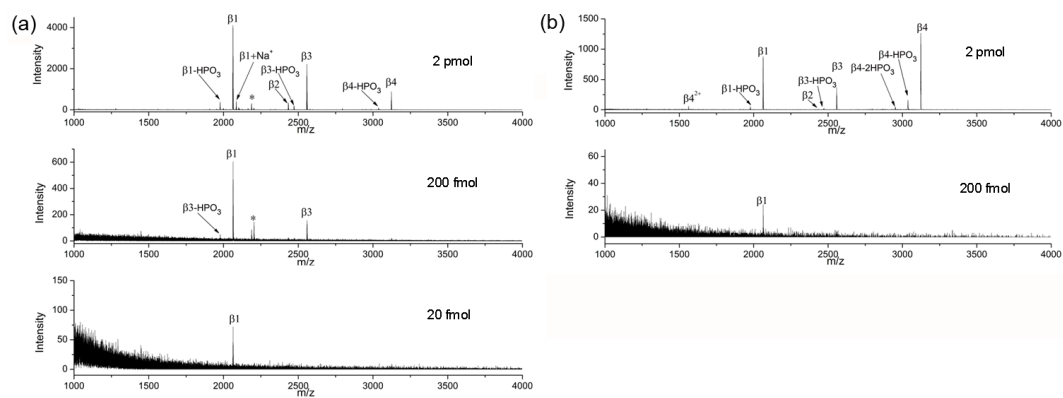

**Fig. S6** MALDI-TOF MS spectra of phosphopeptides enriched from the tryptic digests of  $\beta$ -casein by TNA-integrated microdevice with a) S-shaped and b) linear channel.

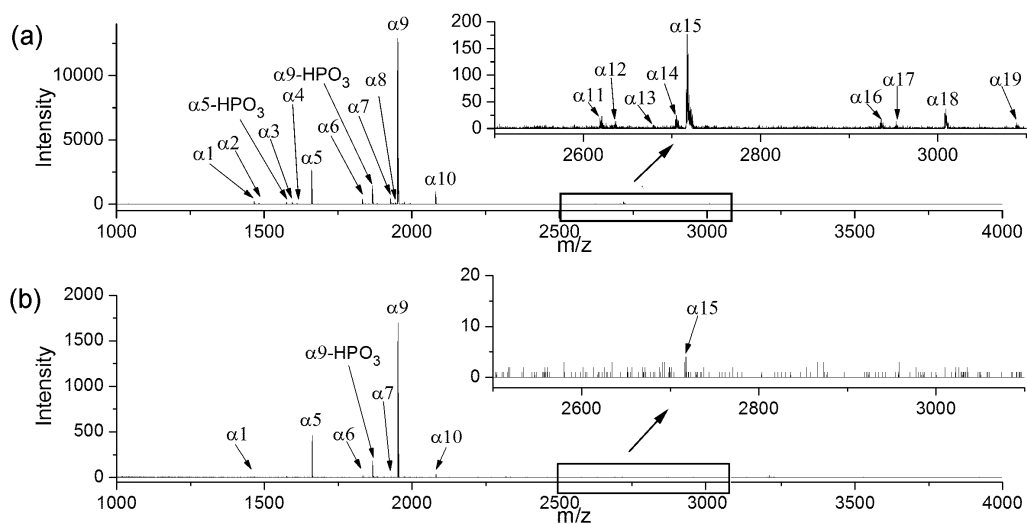

**Fig. S7** MALDI-TOF MS spectra of phosphopeptides enriched from the tryptic digests of  $\alpha$ -casein by TNA-integrated microdevice with (a) S-shaped and (b) linear channel.

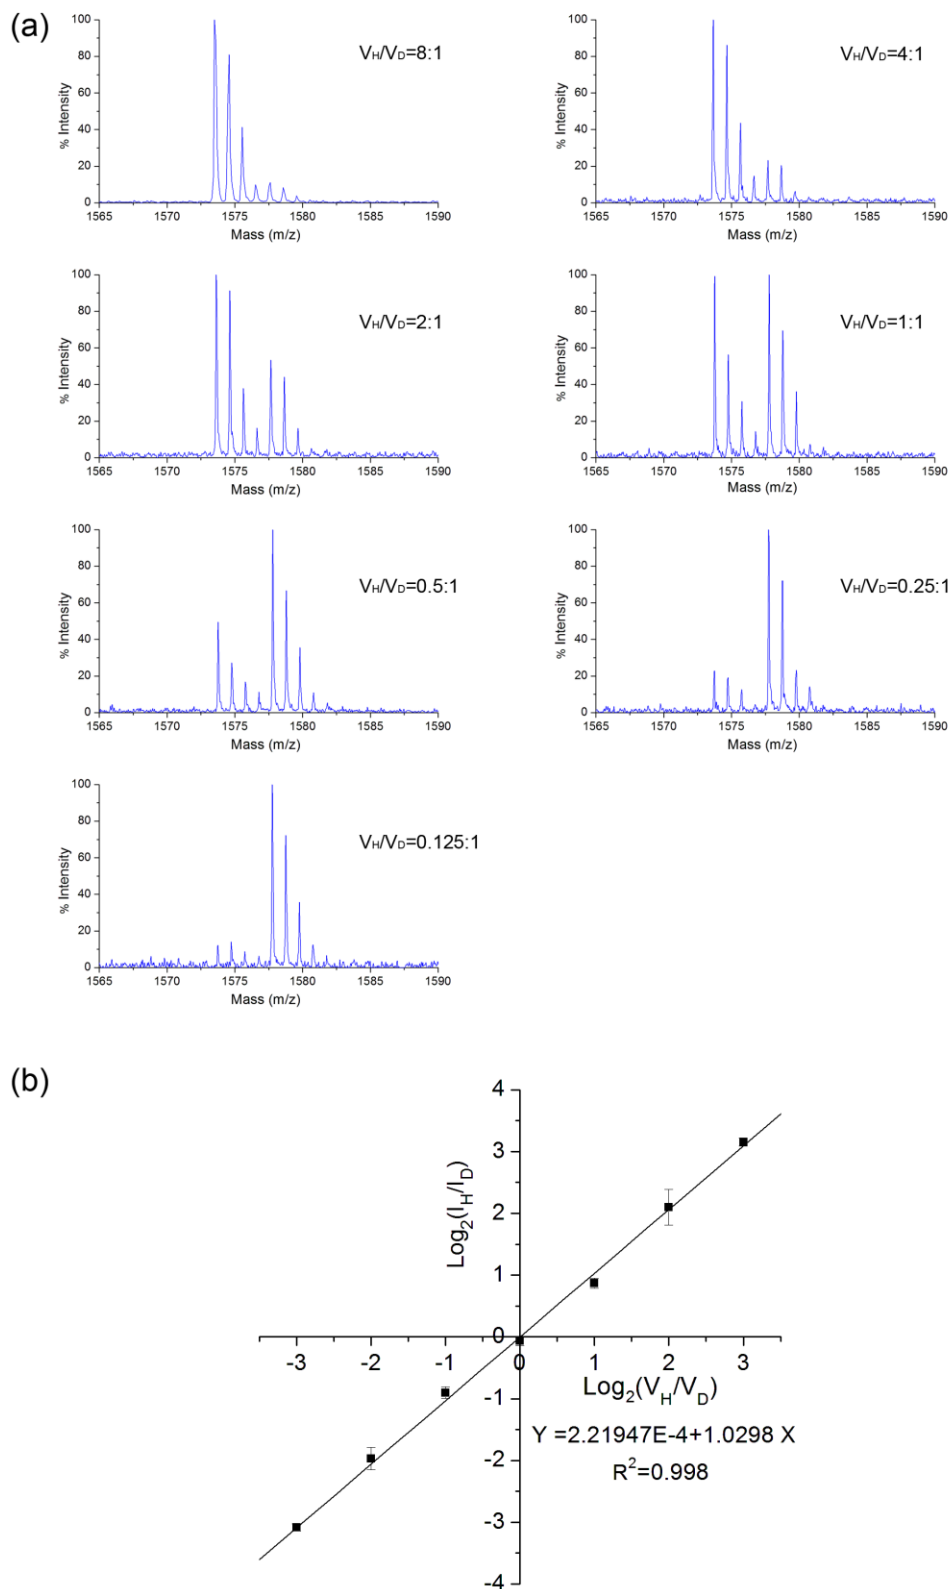

**Fig. S8** (a) MS peak intensity ratios ( $I_H/I_D$ ) of light-isotope-labeled to heavy-isotope-labeled phosphopeptide HS3. The initial volume ratio ( $V_H/V_D$ ) injected for enrichment and isotope dimethyl labeling was set as 8:1, 4:1, 2:1, 1:1, 1:0.5, 1:0.25 and 1:0.125, respectively. (b) Linear relationship between the logarithms of  $I_H/I_D$  and  $V_H/V_D$ .

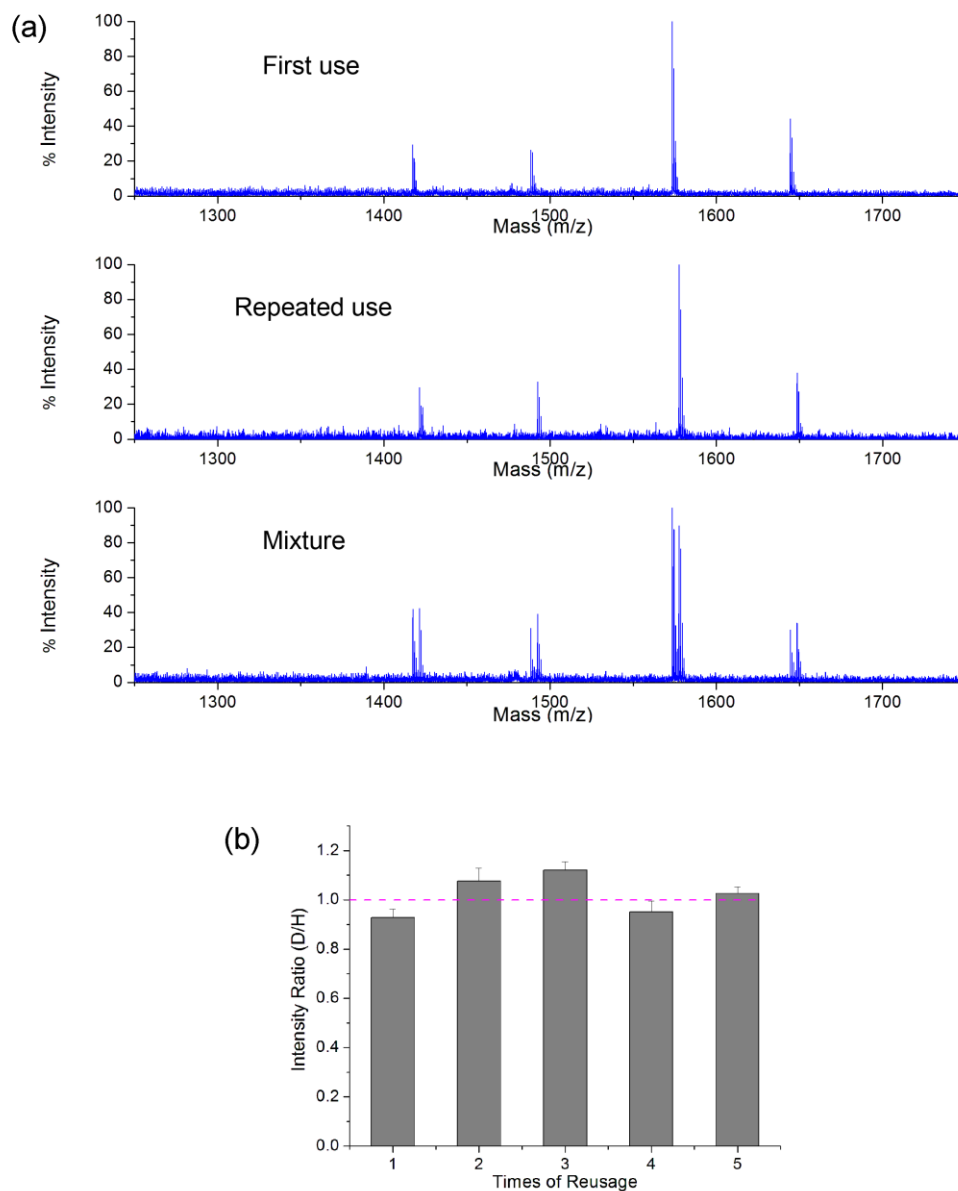

**Fig. S9** (a) MALDI-TOF MS spectra of the four serum phosphopeptides from control sample treated by on-chip enrichment tandem isotope labeling. Light ( $\text{CH}_2\text{O}$ ) and heavy ( $\text{CD}_2\text{O}$ ) isotope labeling were conducted for the first and repeated uses, respectively. (b) MS peak intensity ratios of the heavy-isotope-labeled phosphopeptide HS3 after five consecutive reuses to the light-isotope-labeled phosphopeptide HS3 after the first use.
